# Supplementary material for: A Case of PRPH2-associated Retinal Dystrophy as a Rare Cause of Electronegative ERG
Source: Research Square preprint supplement (doi:10.21203/rs.3.rs-8765134/v1), 2026-02-17
Supplement: Supplementary file 1 [file 655c24b85efe1afe80c7dcf7.docx]

Table S1. ISCEV Standard Ganzfeld ERG values for proband and normal reference range.

| **Right Eye** | |  | **Left Eye** | | **Reference Range** | |
| --- | --- | --- | --- | --- | --- | --- |
| **Amplitude (µV)** | **Latency (ms)** | **Step** | **Amplitude (µV)** | **Latency (ms)** | **Amplitude (µV, 5th – 95th %ile)** | **Latency (ms, 5th – 95th %ile)** |
| 108.4 | 92.5 | **DA 0.01 b wave** | 47.4 | 96 | 116 – 268 | 76 – 106.5 |
| a-wave -145.7  b-wave 149.1 | 21.5  45 | **DA 3.0** | a-wave -79.5  b-wave 84.7 | 16  44 | 100 – 229  168 – 381 | 14.5 – 17  46.5 – 59.5 |
| a-wave -192.2  b-wave 130.5 | 14.5  54 | **DA 10.0** | a-wave -98.2  b-wave 88.3 | 14  56.5 | 125 - 279  192 – 389 | 11 – 15  47 – 59.5 |
| a-wave -33.5  b-wave 88.6 | 15  31 | **LA 3.0 2Hz** | a-wave -20.0  b-wave 59.2 | 15  30.5 | 12 – 39  64 – 175 | 13 – 15.5  27 – 31.5 |
| 65.1 | 28 | **LA 3.0 30Hz** | 46.1 | 27 | 43 – 143 | 24 – 30 |

DA = dark adapted. LA = light adapted.

NB: there is an interocular difference in amplitude for all stimulus conditions with the left eye having smaller responses, for DA 51 – 68% and LA 60 – 71%, respectively.

Table S2. b:a wave ratios.

| **Right Eye** | **Stimulus** | **Left Eye** | **Reference Range**  **Mean ±SD** |
| --- | --- | --- | --- |
| 1.02 | DA 3.0 | 1.07 | 1.83 ±0.30 |
| 0.68 | DA 10.0 | 0.90 | 1.60 ±0.23 |
| 2.66 | LA 3.0 2Hz | 2.97 | 4.34 ±0.70 |

DA = dark adapted. LA = light adapted. SD = standard deviation. All stimuli are in cds/m2. Reference ranges taken from Bhatti et al. PMID: 28434717.

Table S3. Pattern ERG values for the proband and normal reference range.

| **Right Eye** | | **Waveform** | **Left Eye** | | **Reference** | |
| --- | --- | --- | --- | --- | --- | --- |
| **Amplitude (µV)** | **Latency (ms)** |  | **Amplitude (µV)** | **Latency (ms)** | **Amplitude (µV, 5th – 95th %ile)** | **Latency**  **(ms, 5th – 95th %ile)** |
| 1.35 | 45 | **P50** | 1.12 | 48 | 1.92 – 5.36 | 45 – 54 |
| -2.52 | 91 | **N95** | -2.08 | 90 | 3.59 – 8.03 | 80 - 110 |
| 1.87 | | **N95:P50 Ratio** | 1.86 | | 1.50 –1.87 | |
